# Supplementary material for: Non-specific markers of inflammation in bare-nosed wombats (Vombatus ursinus) with sarcoptic mange
Source: Frontiers journal article supplement (doi:10.3389/fvets.2024.1403221), 2024-06-26
Supplement: Table_2.DOCX [file Table_2.DOCX]

**Supplementary Materials, S3**

Table 1. Sample collection date, assay results, and relevant clinical histories of zoo-housed bare-nosed wombats (*Vombatus ursinus*) from a pilot study assessing cross-reactivity of wombat antibodies with commercially available immunoassays for serum amyloid A (SAA) and C-reactive protein (CRP).

| ID | Sample collection date | Vet-SAA~` | SAA-LZ~` | Multispecies SAA~^ | CRP~+ | Relevant clinical history |
| --- | --- | --- | --- | --- | --- | --- |
|  | (mg/L) | (mg/L) | (mg/L) | (mg/L) |  |
| 1 | 09/08/2003 | 0.8 |  | 5.2 | <0.10 | Annual health check* |
| 2 | 09/08/2010 | 0.8 |  | 40.4 | <0.10 | Annual health check* |
| 3 | 04/03/2017 | 1.2 | <0.1 | 0.4 | 0.15 | Annual health check* |
| 4 | 08/09/2016 | 1.3 | <0.1 | 0.2 | <0.10 | Annual health check* |
| 4 | 09/05/2017 | 0.9 | <0.1 | 0.6 | <0.10 | Annual health check* |
| 5 | 12/16/2010 | 0.5 | <0.1 | 0.2 | <0.10 | Unilateral uveitis |
| 5 | 06/25/2014 | 0.5 | <0.1 | < 0.10 | <0.10 | Toxoplasmosis, neutrophilia, azotaemia |
| 6 | 03/28/2006 | 1.1 |  | < 0.10 | <0.10 | Dermatopathy |
| 2 | 02/15/2018 | 1.5 |  | 18.6 | <0.10 | Pancreatitis, peritonitis, cystitis (day of euthanasia) |
| 6 | 04/21/2015 | 0.5 |  | 4.4 | <0.10 | Oral squamous cell carcinoma (7 days prior to euthanasia) |
| 2 | 10/01/2018 | 1.1 |  | 2.8 | <0.10 | Pancreatitis (died one month later) |
| 4 | 09/26/2019 | 1.0 | <0.1 | 3.0 | <0.10 | Nephrolithiasis, leucocytosis |
| 5 | 07/07/2014 | <0.1 | <0.1 | < 0.10 | <0.20 | Interstitial nephritis, glomerulonephritis, aspiration pneumonia, toxoplasmosis |
| 3 | 02/21/2011 | 1.3 | <0.1 | < 0.10 | <0.10 | Flea allergic dermatitis, secondary pyoderma |
| ~ Reagents for these assays have not been validated for use in bare-nosed wombat (*Vombatus ursinus*)  ` Eiken Chemical Co., Japan  ^ Phase™ Range Multispecies SAA ELISA kit, Tridelta, Ireland  + Canine CRP Assay, Randox Laboratories, UK)  * Complete blood counts, serum biochemistry (which did not include serum protein electrophoretic fractions), and clinical examinations were within normal limits | | | | | | |
|  | | | | | | |
